# Supplementary material for: A Score to Predict the Malignancy of a Breast Lesion Based on Different Contrast Enhancement Patterns in Contrast-Enhanced Spectral Mammography
Source: MDPI journal article supplement (doi:10.3390/cancers14174337), 2022-09-05

**Table 1s. Summary of the histological results**

| <b>Histological result</b>                                 | <b>Overall<br/>(N=377)</b> |
|------------------------------------------------------------|----------------------------|
| Acinic cell carcinoma                                      | 2                          |
| Adenosis                                                   | 11                         |
| Atypical ductal hyperplasia (DIN1b)                        | 6                          |
| Atypical lobular hyperplasia (LIN1)                        | 5                          |
| Breast fibroadenoma                                        | 10                         |
| Cribriiform carcinoma                                      | 2                          |
| Ductal hyperplasia without atypia                          | 6                          |
| Fibocystic disease                                         | 1                          |
| Fibroadenoma                                               | 2                          |
| Fibrocystic breast disease                                 | 55                         |
| Fibrosis                                                   | 5                          |
| Flat epithelial atypia                                     | 3                          |
| Flogosis                                                   | 7                          |
| High grade ductal carcinoma in situ (DIN3)                 | 9                          |
| Intermediate grade ductal carcinoma in situ (DIN2)         | 18                         |
| Intermediate grade lobular intraepithelia neoplasia (LIN2) | 1                          |
| Intraductal papilloma                                      | 6                          |
| Invasive cribriform carcinoma                              | 2                          |
| Invasive ductal carcinoma                                  | 163                        |
| Invasive lobular carcinoma                                 | 33                         |
| Invasive mixed carcinoma                                   | 1                          |
| Lobular intraepithelial neoplasia (LIN2)                   | 4                          |
| Low grade ductal carcinoma in situ (DIN1c)                 | 7                          |

|                                              |   |
|----------------------------------------------|---|
| Malignant phylloid                           | 1 |
| Micropapillary carcinoma                     | 1 |
| Mixed ductal and lobular carcinoma           | 9 |
| Mucinous carcinoma                           | 1 |
| Mucocele like lesion                         | 1 |
| Papillomatosis                               | 1 |
| Pseudoangiomatous stromal hyperplasia (PASH) | 1 |
| Radial scar                                  | 3 |

**Table 2s. Distribution of different enhancements and biopsy or surgery histological result (gold standard) (N=377)**

|                                              |                       | Histological result |                            |                             |       |
|----------------------------------------------|-----------------------|---------------------|----------------------------|-----------------------------|-------|
| Enhancements                                 |                       | Benign lesion       | Malignant (In situ) lesion | Malignant (Invasive) lesion | Total |
| <b>Intensity</b>                             | Benign lesion         | 116                 | 15                         | 38                          | 169   |
|                                              | Malignant lesion      | 12                  | 17                         | 179                         | 208   |
| <b>Margin morphology</b>                     | Benign lesion         | 115                 | 9                          | 20                          | 144   |
|                                              | Malignant lesion      | 13                  | 23                         | 197                         | 233   |
| <b>Pattern</b>                               | Benign lesion         | 121                 | 11                         | 31                          | 163   |
|                                              | Malignant lesion      | 7                   | 21                         | 186                         | 214   |
| <b>Ground glass</b>                          | Benign lesion         | 117                 | 13                         | 33                          | 163   |
|                                              | Malignant lesion      | 11                  | 19                         | 184                         | 214   |
| <b>Enhancement score <math>\geq 2</math></b> | No, Benign lesion     | 115                 | 8                          | 11                          | 134   |
|                                              | Yes, Malignant lesion | 13                  | 24                         | 206                         | 243   |
| <b>Total</b>                                 |                       | 128                 | 32                         | 217                         | 377   |

Table 3s. Phi Coefficient among CESM enhancements (Benign vs. Malignant)

| Enhancements      | Intensity | Margin morphology | Pattern | Ground glass |
|-------------------|-----------|-------------------|---------|--------------|
| Intensity         |           | 0.62              | 0.65    | 0.94         |
| Margin morphology | 0.62      |                   | 0.76    | 0.67         |
| Pattern           | 0.65      | 0.76              |         | 0.68         |
| Ground glass      | 0.94      | 0.67              | 0.68    |              |

Figure S1. ROC curve of the model with score enhancements as independent variable and histological result (Benign vs. Any malignant) as dependent variable

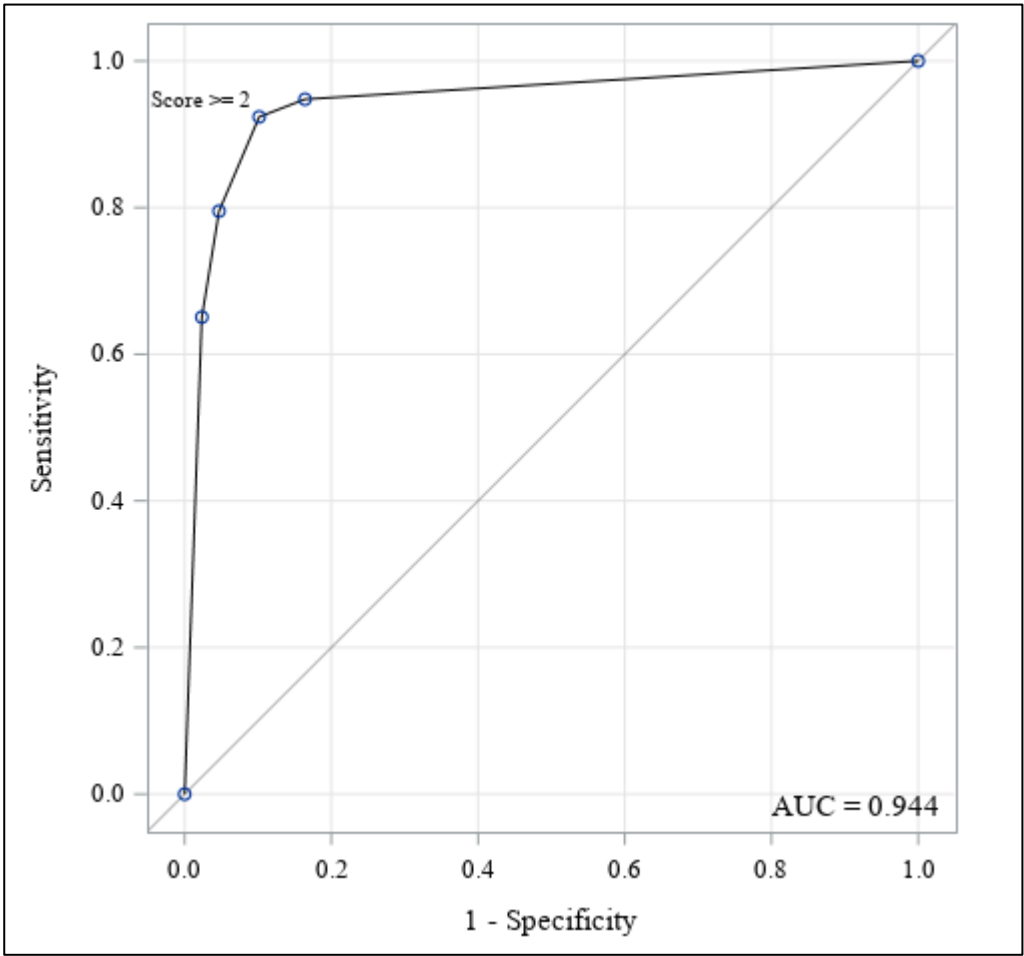

Supplement: s1 [file s1]
